# Supplementary material for: Impact of probe annotation on the integration of miRNA–mRNA expression profiles for miRNA target detection
Source: PubMed Central journal article supplement — Nucleic Acids Res. 2010 Jan 13;38(7):e97. doi: 10.1093/nar/gkp1239 (PMC2853140; doi:10.1093/nar/gkp1239), 2010-01-13
Supplement: gkp1239_1.pdf [file gkp1239_1.pdf]

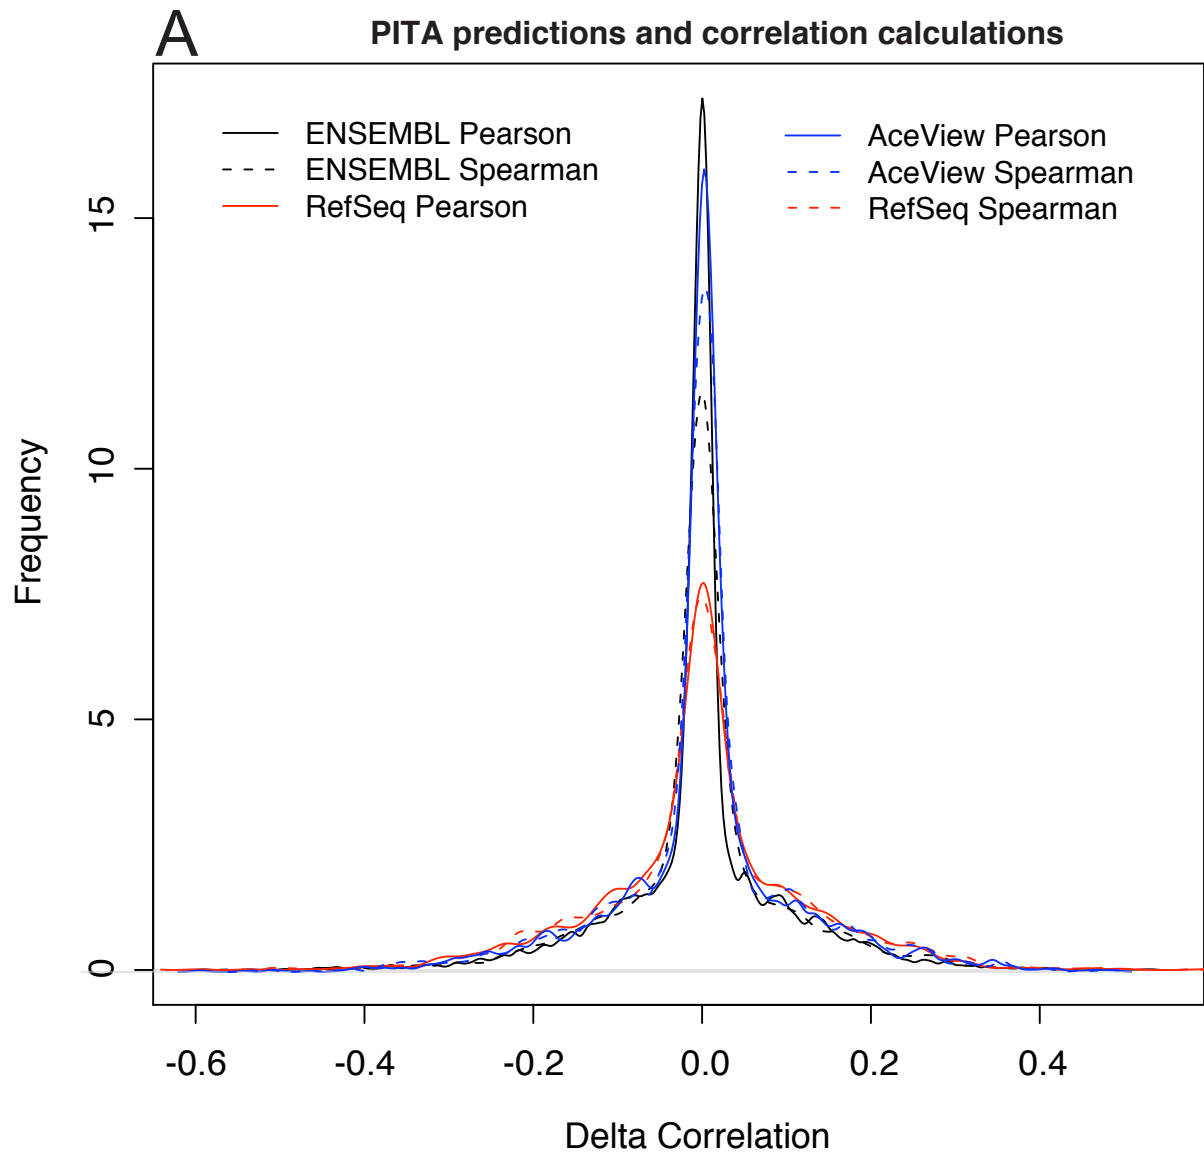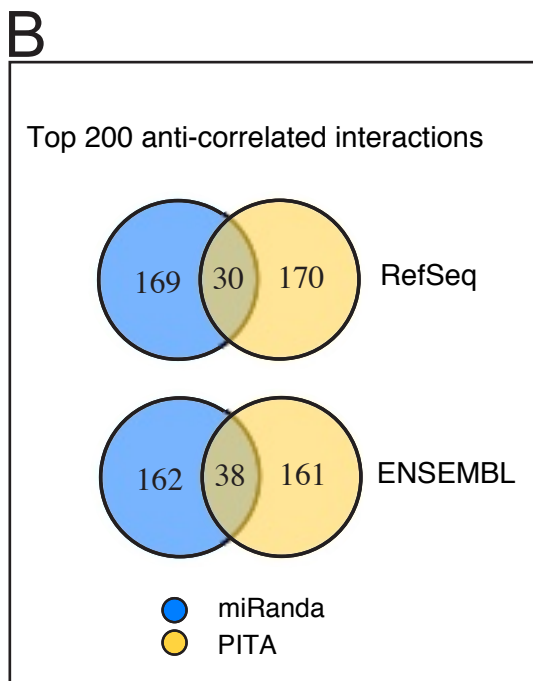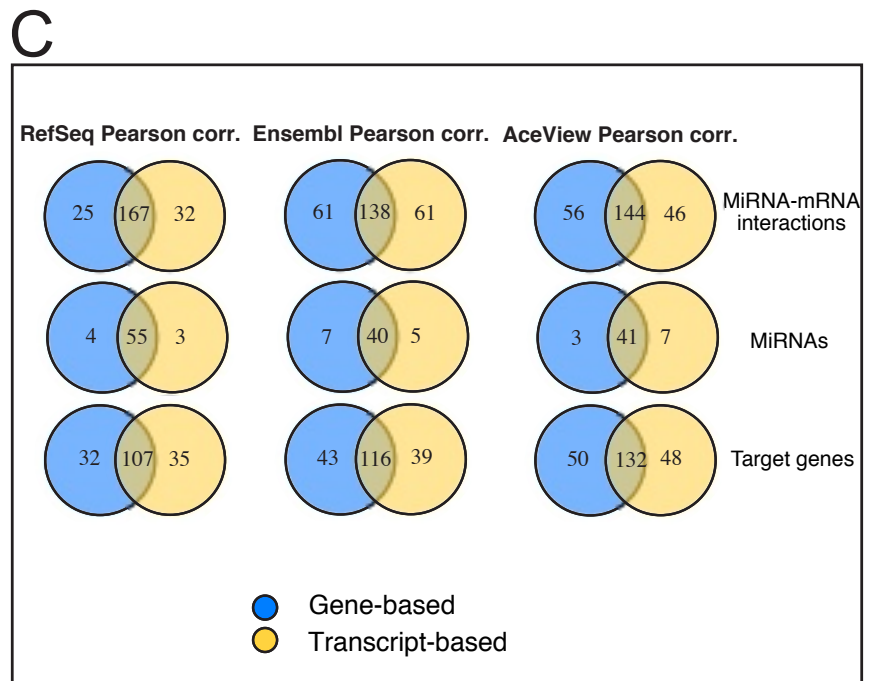

**Figure S1: Panel A.** Differences in parametric and non-parametric correlation estimate between transcript and gene-based annotation, using ENSEMBL and RefSeq databases and PITA algorithm. **Panel B.** Comparison of top 200 anti-correlated miRNA-mRNA interactions between the miRanda and the PITA algorithms. **Panel C.** Venn diagrams show the comparisons (in terms of targets and miRNAs identified) of the top 1% putative interactions

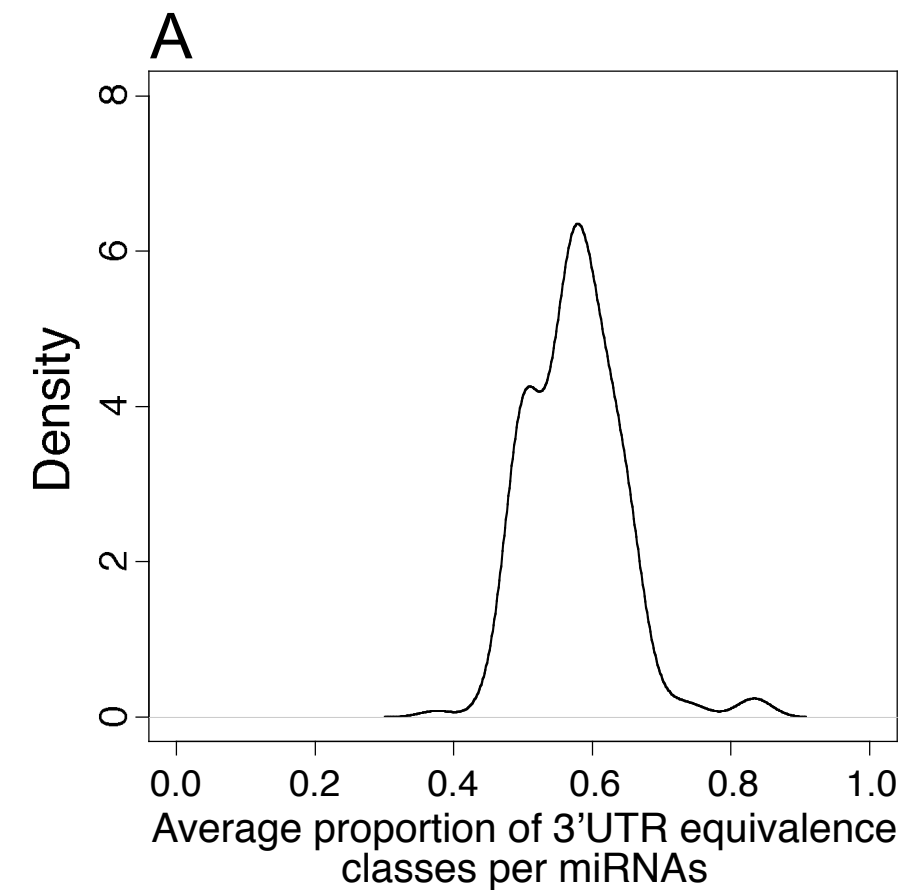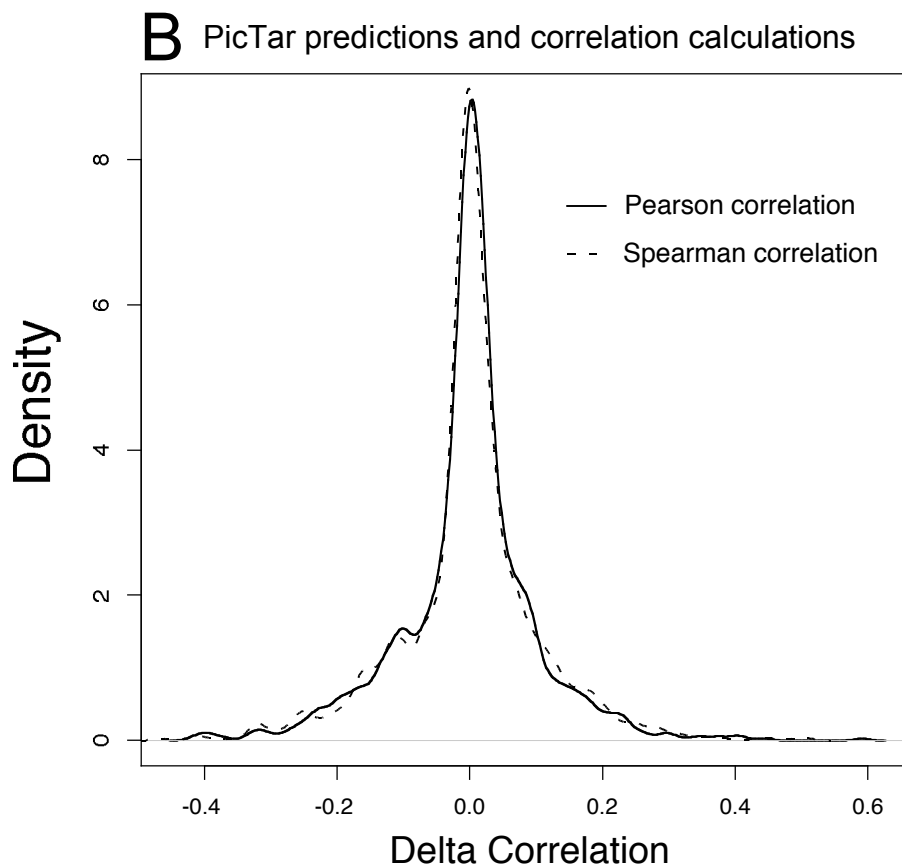

**Figure S2: Panel A.** Distribution of the average number of 3'UTR equivalence classes *per gene* targeted by miRNAs using RefSeq databases with PicTar target prediction algorithm. **Panel B.** Differences in parametric and non-parametric correlation estimate using RefSeq databases and PicTar algorithm.

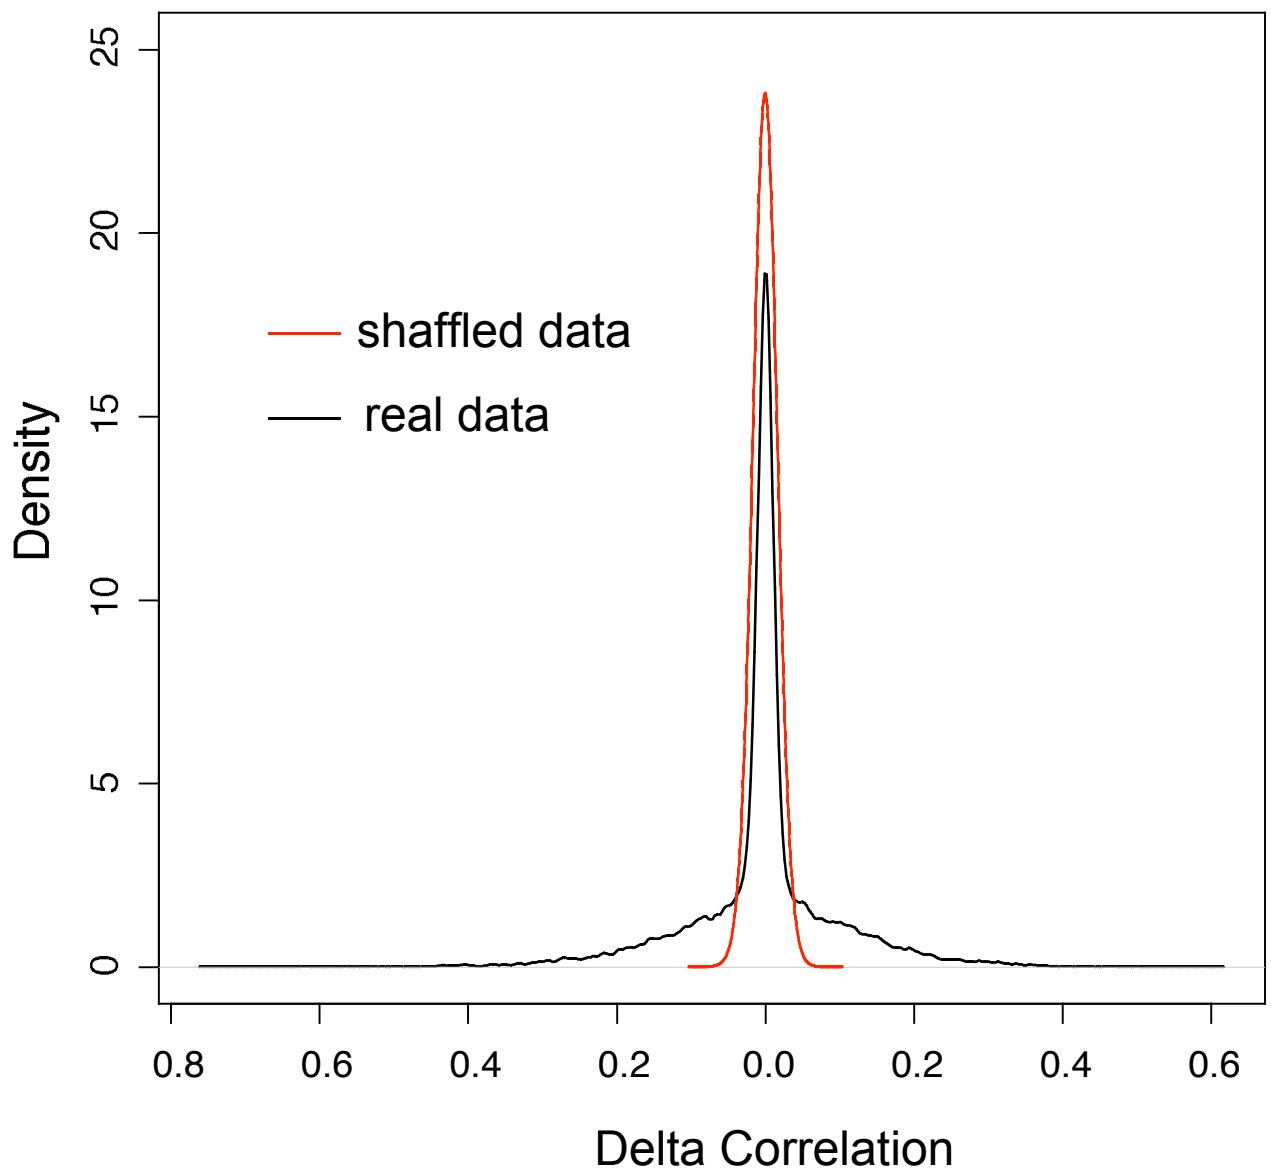

**Figure S3:** Comparison of the delta correlation distributions derived from real and randomly permuted data.

### miRanda

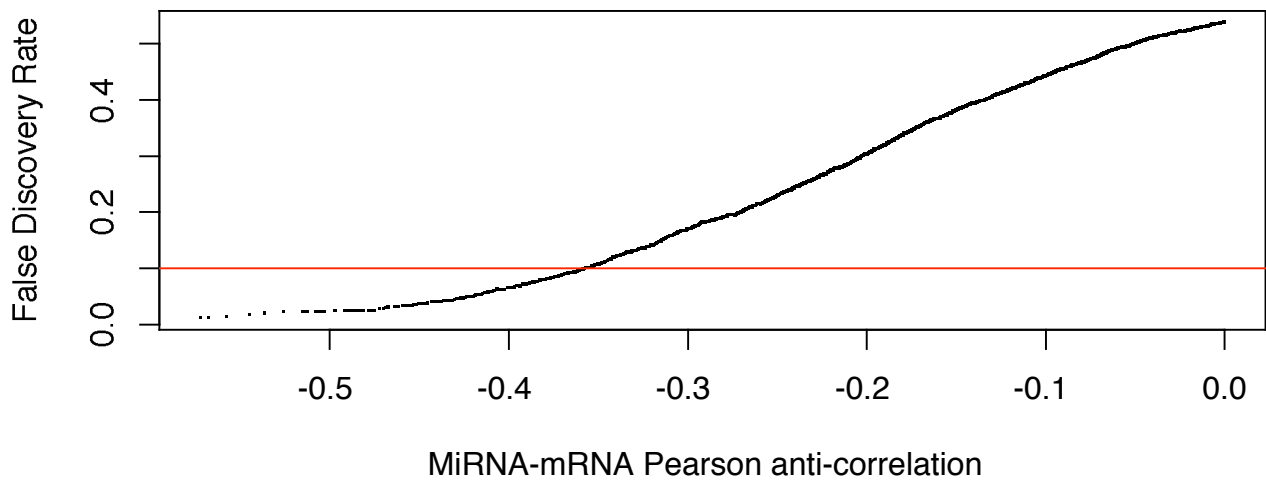

### PITA

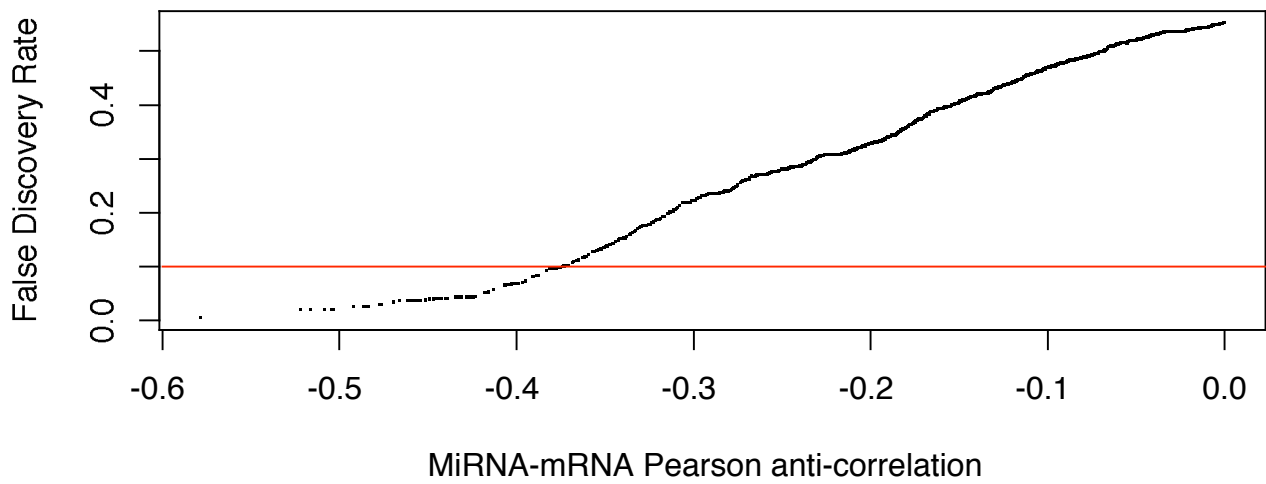

**Figure S4:** FDR and anti-correlation value relationships after miRanda and PITA target predictions. Red line identifies the coefficient threshold corresponding to an FDR equal to 0.1.

**Table S1.** Number of probes in Affymetrix platforms filtered according to the transcript-based annotation. The last column represents the number of transcript uniquely represented by at least 4 probes (meta-probe set) using ENSEMBL.

| Platform ID    | Total number of probes | % mis-assigned probes | % non-specific probes | % unique probes | Number of identified transcripts |
|----------------|------------------------|-----------------------|-----------------------|-----------------|----------------------------------|
| HG95v2         | 201,800                | 19%                   | 45%                   | 36%             | 4,356                            |
| HG133A 2.0     | 247,899                | 21%                   | 44%                   | 35%             | 6,583                            |
| HG133plus2     | 604,258                | 47%                   | 28%                   | 25%             | 10,799                           |
| H. Exon 1.0 ST | 5,431,934              | 74%                   | 14%                   | 11%             | 26,214                           |

**Table S2.** Number of predicted miRNA-target interactions obtained through three target identification algorithms (miRanda, PITA and PicTar) and three different transcript annotation databases (RefSeq, ENSEMBL, AceView). Since PicTar software is not freely available, miRNA-mRNA interactions are those provided by the developers on RefSeq only.

|                | RefSeq | ENSEMBL | AceView |
|----------------|--------|---------|---------|
| <b>MiRanda</b> | 6,695  | 20,790  | 54,293  |
| <b>PITA</b>    | 2,359  | 7,409   | 3,413   |
| <b>PicTar</b>  | 1,320  | -       | -       |

**Table S3:** Enriched metabolic pathways (**GSEA approach**) of the gene-based and transcript-based anti-correlated miRNA-mRNA interactions (using miRanda and ENSEMBL)

| Transcript-based Pathways                                  | p-value      | Gene-based Pathways           | p-value    |
|------------------------------------------------------------|--------------|-------------------------------|------------|
| Melanogenesis                                              | 0.01         |                               |            |
| Calcium signaling pathway                                  | 0.012        | Calcium signaling pathway     | 0.73       |
| Long term potentiation                                     | 0.014        |                               |            |
| Gap junction                                               | 0.036        |                               |            |
| Epithelial cell signaling in helicobacter pylori infection | 0.05         |                               |            |
| <b>Gnrh signaling pathway</b>                              | <b>0.096</b> | <b>Gnrh signaling pathway</b> | <b>0.5</b> |
| <b>ErbB signaling pathway</b>                              | <b>0.11</b>  |                               |            |
| <b>Prostate cancer</b>                                     | <b>0.12</b>  |                               |            |
| Colorectal cancer                                          | 0.15         |                               |            |
| Insulin signaling pathway                                  | 0.18         | Insulin signaling pathway     | 0.7        |
| Wnt signaling pathway                                      | 0.19         |                               |            |
